# Supplementary material for: Temperature Affects Chemical Defense in a Mite-Beetle Predator-Prey System
Source: Springer Nature journal article supplement (doi:10.1007/s10886-020-01212-3), 2020-09-02
Supplement: MOESM2 [file 10886_2020_1212_MOESM2_ESM.xlsx]

## Sheet: Meta_data
Supplement to:
Temperature affects chemical defense in a mite-beetle predator-prey system
Christoph Merkel1, Michael Heethoff1 and Adrian Brückner2*
1 Ecological Networks, Technische Universität Darmstadt, Schnittspahnstraße 3, 64287 Darmstadt, Germany
2 Division of Biology and Biological Engineering, California Institute of Technology, 1200 E California Boulevard, Pasadena, CA 91125, United States of America

## Sheet: amount_data
TEMP	DAY	amount
15	1	0
15	1	0
15	1	0
15	1	3
15	1	8
15	1	0
15	1	0
15	1	8
15	1	0
15	1	0
15	2	2
15	2	6
15	2	0
15	2	0
15	2	1
15	2	0
15	2	0
15	2	8
15	2	0
15	3	6
15	3	3
15	3	4
15	3	9
15	3	0
15	3	0
15	3	6
15	3	0
15	3	1
15	3	4
15	4	3
15	4	6
15	4	0
15	4	0
15	4	0
15	4	0
15	4	0
15	4	0
15	4	0
15	4	0
15	5	6
15	5	1
15	5	5
15	5	4
15	5	1
15	5	2
15	5	0
15	5	10
15	5	1
15	5	0
15	6	0
15	6	0
15	6	0
15	6	6
15	6	9
15	6	1
15	6	0
15	6	0
15	6	0
15	6	1
15	7	0
15	7	1
15	7	0
15	7	7
15	7	0
15	7	2
15	7	0
15	7	0
15	7	0
15	7	14
15	14	0
15	14	0
15	14	5
15	14	0
15	14	0
15	14	0
15	14	0
15	14	0
15	14	14
15	14	1
15	21	0
15	21	0
15	21	3
15	21	2
15	21	0
15	21	0
15	21	3
15	21	7
15	21	22
15	21	0
20	1	3
20	1	1
20	1	0
20	1	0
20	1	0
20	1	0
20	1	0
20	1	7
20	1	1
20	1	2
20	2	4
20	2	1
20	2	35
20	2	3
20	2	6
20	2	25
20	2	0
20	3	10
20	3	5
20	3	9
20	3	0
20	3	7
20	3	0
20	3	2
20	3	0
20	4	7
20	4	14
20	4	11
20	4	3
20	4	6
20	4	8
20	4	4
20	4	7
20	4	7
20	4	10
20	5	10
20	5	27
20	5	6
20	5	13
20	5	20
20	5	16
20	5	4
20	5	0
20	5	39
20	5	4
20	6	19
20	6	0
20	6	9
20	6	3
20	6	4
20	6	11
20	6	1
20	6	50
20	6	5
20	6	0
20	7	8
20	7	0
20	7	49
20	7	34
20	7	8
20	7	8
20	7	48
20	7	33
20	7	21
20	7	47
20	14	130
20	14	19
20	14	42
20	14	23
20	14	81
20	14	8
20	14	37
20	14	78
20	14	21
20	14	15
20	21	0
20	21	35
20	21	144
20	21	16
20	21	12
20	21	68
20	21	0
20	21	46
20	21	15
20	21	57
25	1	20
25	1	1
25	1	0
25	1	3
25	1	20
25	1	5
25	1	4
25	1	4
25	1	2
25	2	4
25	2	6
25	2	7
25	2	7
25	2	6
25	2	5
25	2	6
25	3	35
25	3	23
25	3	24
25	3	9
25	3	12
25	3	22
25	3	4
25	3	17
25	3	9
25	3	5
25	4	23
25	4	63
25	4	14
25	4	61
25	4	22
25	4	15
25	4	12
25	4	6
25	4	22
25	4	8
25	5	31
25	5	39
25	5	12
25	5	31
25	5	19
25	5	49
25	5	7
25	5	28
25	5	17
25	5	25
25	6	29
25	6	59
25	6	27
25	6	28
25	6	37
25	6	27
25	6	38
25	6	30
25	6	36
25	6	16
25	7	25
25	7	23
25	7	56
25	7	71
25	7	70
25	7	41
25	7	69
25	7	1
25	7	43
25	7	53
25	14	23
25	14	7
25	14	33
25	14	3
25	14	58
25	14	5
25	14	7
25	14	56
25	14	33
25	14	59
25	21	18
25	21	100
25	21	30
25	21	29
25	21	54
25	21	22
25	21	66
25	21	66
25	21	75
25	21	150
30	1	3
30	1	5
30	1	6
30	1	10
30	1	5
30	1	4
30	1	10
30	1	1
30	2	12
30	2	12
30	2	12
30	2	0
30	2	35
30	2	18
30	2	2
30	2	10
30	3	15
30	3	24
30	3	25
30	3	20
30	3	12
30	3	18
30	4	59
30	4	30
30	4	32
30	4	15
30	4	10
30	4	16
30	4	19
30	4	23
30	4	62
30	4	8
30	5	20
30	5	67
30	5	9
30	5	12
30	5	12
30	5	92
30	5	21
30	5	13
30	5	51
30	5	17
30	6	11
30	6	25
30	6	27
30	6	13
30	6	12
30	6	9
30	6	26
30	6	29
30	6	49
30	6	0
30	7	6
30	7	5
30	7	25
30	7	28
30	7	58
30	7	29
30	7	92
30	7	30
30	7	8
30	14	27
30	14	54
30	14	24
30	14	67
30	14	5
30	14	70
30	14	41
30	14	28
30	14	36
30	14	14
30	21	12
30	21	18
30	21	3
30	21	52
30	21	44
30	21	189
30	21	7
30	21	92
30	21	23
30	21	47
35	1	5
35	1	2
35	1	14
35	1	5
35	1	18
35	1	4
35	1	36
35	1	5
35	1	4
35	2	6
35	2	8
35	2	3
35	2	5
35	2	5
35	2	13
35	2	42
35	2	12
35	3	31
35	3	2
35	3	4
35	3	6
35	3	11
35	3	7
35	3	5
35	3	16
35	3	10
35	3	0
35	4	8
35	4	28
35	4	11
35	4	10
35	4	7
35	4	7
35	4	5
35	4	26
35	4	31
35	4	25
35	5	16
35	5	13
35	5	0
35	5	51
35	5	5
35	5	12
35	5	10
35	5	10
35	5	4
35	5	0
35	6	39
35	6	11
35	6	10
35	6	0
35	6	40
35	6	2
35	6	40
35	6	31
35	6	6
35	6	23
35	7	9
35	7	9
35	7	21
35	7	18
35	7	19
35	7	8
35	7	2
35	7	27
35	7	0
35	14	32
35	14	9
35	14	36
35	14	98
35	14	0
35	14	27
35	14	3
35	14	18
35	14	11
35	14	13
35	21	2
35	21	14
35	21	47
35	21	18
35	21	25
40	1	19
40	1	0
40	1	0
40	1	1
40	1	0
40	2	0
40	2	0
40	2	2
40	2	0
40	2	0
40	3	0
40	3	5
40	3	0
40	3	0
40	3	5
40	3	0
40	3	0
40	3	0
40	3	0
40	4	3
40	4	3
40	4	0
40	4	0
40	4	1
40	4	0
40	4	1
40	4	0
40	4	8
40	4	11
40	5	5
40	5	7
40	5	0
40	5	9
40	5	10
40	5	5
40	5	0
40	5	2
40	5	1
40	5	0
40	6	0
40	6	6
40	6	12
40	6	10
40	6	0
40	6	8
40	6	2
40	6	1
40	6	17
40	6	6
40	7	4
40	7	8
40	7	0
40	7	3
40	7	3
40	7	1
40	7	0
40	7	21
40	7	7
40	7	13
40	14	0
40	14	0
40	14	0
40	14	0
40	14	0
40	14	1
40	14	4
40	14	0
40	14	4
40	14	0
40	21	0
40	21	0
40	21	8
40	21	0

## Sheet: composition_data
TEMP_fixed	DAY_random	ID_random	HMBD	NER	NYL	TRI	ACA	C15:1	C15	C17
15	1	5	0.279584	0	0	0	0.720416	0	0	0
15	1	6	0.138399	0.143979	0.484732	0	0	0	0.114786	0.118104
15	1	9	0.0923015	0.159282	0.527106	0	0.022171	0	0.0537806	0.145359
15	2	1	0.109042	0.344002	0.10717	0.000293124	0.393272	0	0	0.0462203
15	2	3	0.508931	0.144	0.128335	0.016559	0	0.0162196	0.0846234	0.101331
15	2	5	0.897377	0	0.102623	0	0	0	0	0
15	2	6	0.238804	0	0	0.0572655	0.107441	0	0.234048	0.362441
15	2	8	0.626864	0	0	0	0.373136	0	0	0
15	2	9	0.267279	0.135739	0.212067	0.0156784	0.101507	0.0331508	0.123094	0.111485
15	2	10	0.434761	0	0.239043	0.0611028	0	0	0	0.265093
15	3	1	0.248309	0.28491	0.198303	0	0	0.0337079	0.0868434	0.147926
15	3	2	0.589607	0	0.0709472	0.0165521	0	0.0433529	0.105679	0.173861
15	3	3	0.0918484	0	0.148966	0	0.395662	0.0433616	0.132438	0.187724
15	3	4	0.1227	0.200614	0.117979	0.0156114	0.275604	0	0.112772	0.154719
15	3	7	0.197044	0.320704	0.159252	0.0273246	0.0272404	0.0488085	0.107569	0.112058
15	3	8	1	0	0	0	0	0	0	0
15	3	9	0.46526	0	0	0	0.53474	0	0	0
15	3	10	0.419181	0.284043	0.0864604	0.00624227	0.024089	0.0263986	0.0641348	0.0894508
15	4	1	0.0868176	0.0407884	0.364122	0.0494823	0	0.0690691	0.135765	0.253956
15	4	2	0.329992	0.00978092	0	0	0.637187	0	0.0230405	0
15	4	8	0	0	0	0	1	0	0	0
15	4	9	0	0	0	0	0	0	1	0
15	4	10	1	0	0	0	0	0	0	0
15	5	1	0.308456	0.22532	0.0848632	0.0119012	0.198361	0.0316659	0.0593228	0.0801096
15	5	2	0.102786	0	0.0645906	0.0885214	0.265691	0	0.119438	0.358974
15	5	3	0.0418979	0.259882	0.0222265	0.0340557	0.044775	0.0844571	0.262745	0.249961
15	5	4	0.184129	0.377221	0.0268773	0.0270418	0.181948	0	0.121999	0.0807839
15	5	5	0.351488	0	0	0	0.224705	0	0.0552515	0.368555
15	5	6	0.240753	0	0	0	0.759247	0	0	0
15	5	8	0.0836273	0.242076	0.0812917	0.00438104	0.288412	0	0.156216	0.143996
15	5	9	0	0	0	0.157237	0	0	0.46495	0.377813
15	6	1	0.683905	0	0	0	0.316095	0	0	0
15	6	4	0.120596	0.503663	0.0346855	0.0409857	0.0357907	0.0804899	0.183789	0
15	6	5	0.134318	0.30381	0.0634701	0.0355555	0.199697	0.043969	0.106217	0.112962
15	6	6	0.609004	0	0	0	0	0	0.282001	0.108996
15	6	7	0.73205	0	0.0814764	0.186474	0	0	0	0
15	6	10	0.841977	0	0	0	0	0	0.100791	0.0572321
15	7	2	0.396551	0	0	0	0.603449	0	0	0
15	7	3	0.704871	0	0	0	0.295129	0	0	0
15	7	4	0.13784	0.414841	0.0942156	0.0134408	0.1089	0.0331406	0.0770525	0.120569
15	7	5	0.767994	0	0	0	0	0	0	0.232006
15	7	6	0.17468	0.481621	0.0202094	0	0.23066	0	0.0928298	0
15	7	10	0.141498	0.272962	0.0585212	0.00256489	0.405091	0.0084976	0.0405708	0.0702954
15	14	2	1	0	0	0	0	0	0	0
15	14	3	0.0884647	0.398537	0.0432283	0.077976	0.294239	0	0.0975553	0
15	14	8	0	0	0	0	1	0	0	0
15	14	9	0.0376988	0.31496	0.0840322	0.02916	0.250382	0.0493068	0.160444	0.0740162
15	14	10	0.340532	0	0.102653	0	0.556815	0	0	0
15	21	3	0.0653593	0.412959	0.0439827	0.0549345	0	0	0.271971	0.150794
15	21	4	0.664187	0	0	0.0812652	0	0	0.0202813	0.234267
15	21	7	0	0.318081	0.122131	0	0	0	0.357858	0.20193
15	21	8	0.111943	0.269284	0.0398513	0.00165584	0.577266	0	0	0
15	21	9	0.0498203	0.194907	0.0384595	0.054564	0.579679	0	0.0442219	0.038348
20	1	2	0.455707	0.155242	0.0181615	0.0757287	0.0913499	0	0.0639514	0.13986
20	1	3	0.181735	0	0	0.496639	0	0	0.321626	0
20	1	7	0.475389	0	0	0	0.524611	0	0	0
20	1	9	0.196556	0.2123	0.13826	0.0524463	0.0235009	0.0338721	0.182074	0.160991
20	1	10	0.340212	0	0	0	0.342207	0	0.0860929	0.231489
20	1	1	0.14335	0	0	0	0.85665	0	0	0
20	2	2	0.627491	0.218143	0.0450093	0.0298374	0	0	0.0434003	0.0361181
20	2	3	0.440372	0	0	0	0.559628	0	0	0
20	2	6	0.159284	0.142992	0.166454	0.019372	0.375066	0.0145033	0.0666379	0.0556906
20	2	7	0.0723103	0.322579	0.0632468	0.111796	0	0	0.194569	0.235499
20	2	8	0.414557	0.184341	0.0847408	0.0537787	0.0683979	0.0406828	0.0787939	0.0747085
20	2	9	0.0892014	0.137303	0.256978	0.0454253	0.193986	0.0334923	0.142684	0.100931
20	3	1	0.109434	0.34279	0.0724128	0.126134	0	0.0575712	0.205306	0.0863517
20	3	2	0.260294	0.422061	0.116717	0.0575782	0	0.0243538	0.0644831	0.0545133
20	3	4	0.191384	0.373984	0.105342	0.0411365	0	0.0437965	0.151859	0.0924981
20	3	6	1	0	0	0	0	0	0	0
20	3	7	0.0964455	0.0777428	0.0498915	0.115258	0.152947	0.0590105	0.331225	0.117481
20	3	8	1	0	0	0	0	0	0	0
20	3	9	0.354387	0.47754	0.015195	0.122174	0	0	0.0307041	0
20	3	10	0	0	1	0	0	0	0	0
20	4	1	0.228837	0.223004	0.0895087	0.0670907	0.052596	0.0601852	0.126983	0.151796
20	4	2	0.0818102	0.217453	0.0343481	0.0383079	0.479165	0.0224972	0.0687104	0.0577084
20	4	3	0.157629	0.36515	0.0584615	0.01321	0.257673	0.0168167	0.0538788	0.077181
20	4	4	0.169411	0.563392	0.048996	0.0265488	0	0	0.0786763	0.112976
20	4	5	0.193342	0.48727	0.041313	0.00840234	0.141686	0	0.0443501	0.0836364
20	4	6	0.273499	0.286746	0.0409925	0.0484435	0.12067	0.0300673	0.106301	0.0932809
20	4	7	0.926362	0.0252083	0	0	0.0484301	0	0	0
20	4	8	0.217772	0.453304	0.123674	0.0464655	0	0.0254878	0.0628738	0.0704235
20	4	9	0.120004	0.438428	0.0133295	0.0512911	0.194831	0.0148271	0.0376085	0.129681
20	4	10	0.133066	0.306769	0.0829215	0.0626665	0.0515274	0.0672903	0.155694	0.140065
20	5	1	0.306918	0.27701	0.108232	0.0177864	0.0167272	0.0535853	0.123822	0.0959194
20	5	2	0.0994406	0.293976	0.183594	0.057341	0.0404065	0.0721126	0.184462	0.0686671
20	5	3	0.395355	0.272962	0	0	0.331683	0	0	0
20	5	4	0.156094	0.290725	0.0751021	0.133499	0	0.0686812	0.144541	0.131356
20	5	5	0.12773	0.39266	0.100227	0.0612505	0.0413469	0.0508157	0.130241	0.095729
20	5	6	0.0721987	0.518407	0.0587227	0.0387441	0.183844	0.019291	0.034584	0.0742082
20	5	7	0.161336	0.732285	0.0489898	0.0209574	0	0	0.0364319	0
20	5	8	1	0	0	0	0	0	0	0
20	5	9	0.11776	0.360515	0.101077	0.0269789	0.241729	0.0260257	0.0826611	0.0432532
20	5	10	0.29143	0.287498	0.0155809	0.112243	0.0434426	0.121593	0.00167623	0.126537
20	6	1	0.208824	0.23564	0.0890325	0.113469	0.0828682	0.0551268	0.108534	0.106507
20	6	2	0	0	0	0	0	0	1	0
20	6	3	0.0923749	0.567297	0	0.083351	0.00488582	0	0.100067	0.152024
20	6	4	0.621207	0.250188	0	0.128605	0	0	0	0
20	6	5	0.525535	0.357772	0	0	0	0.116694	0	0
20	6	6	0.0856384	0.369479	0.0478826	0.0877558	0.221373	0.0310139	0.0497641	0.107093
20	6	7	0.25614	0.114065	0	0.629794	0	0	0	0
20	6	8	0.153367	0.250408	0.149847	0.0494497	0.119673	0.0479646	0.153899	0.0753926
20	6	9	0.0292221	0.560401	0	0.152617	0.25776	0	0	0
20	6	10	1	0	0	0	0	0	0	0
20	7	1	0.212589	0.462923	0.0531784	0.023262	0.148388	0	0.0344586	0.0652012
20	7	3	0.0912265	0.293538	0.0960358	0.0652913	0.317917	0.0216395	0.0601682	0.0541844
20	7	4	0.175298	0.27545	0.124167	0.0573434	0.12668	0	0.165847	0.0752154
20	7	5	0.211337	0.132665	0.0291433	0.0842006	0.0345821	0.0771509	0.221968	0.208954
20	7	6	0.114893	0.626537	0.0910267	0	0.0732591	0	0.0188743	0.0754103
20	7	7	0.133072	0.329502	0.136219	0.0410506	0.172729	0.0375612	0.091001	0.0588653
20	7	8	0.163572	0.52347	0.0932609	0.0552278	0.0592511	0.0184121	0.0427747	0.044031
20	7	9	0.127012	0.423131	0.0843902	0.0460194	0.219739	0.0224355	0.0379279	0.0393452
20	7	10	0.153524	0.434776	0.128409	0.0377709	0.148407	0.024789	0.0414706	0.0308537
20	14	1	0.128181	0.375139	0.106623	0.0510159	0.21306	0.0356947	0.059951	0.0303351
20	14	2	0.096954	0.579592	0.0246284	0.0128991	0.284321	0	0	0.00160532
20	14	3	0.0506816	0.545033	0.0913139	0.0980348	0.0366508	0.0377159	0.0770999	0.06347
20	14	4	0.0408817	0.444354	0.0410109	0.0248703	0.384883	0	0.0173753	0.0466241
20	14	5	0.0409456	0.373408	0.0683497	0.0507234	0.404723	0.0103301	0.0205325	0.0309878
20	14	6	0.0880836	0.556024	0.062981	0.0576807	0	0.0525813	0.0868191	0.0958303
20	14	7	0.0765444	0.504257	0.0588063	0.0706049	0.215332	0.0153421	0.0211709	0.0379426
20	14	8	0.10346	0.303591	0.0935583	0.0418961	0.375029	0.0127806	0.0353233	0.0343617
20	14	9	0.0451959	0.478023	0.059721	0.0904451	0.0516963	0.057671	0.130381	0.0868664
20	14	10	0.0395312	0.415919	0.0276372	0.14513	0.0621766	0.0469554	0.12031	0.142341
20	21	2	0.106126	0.574038	0.0320219	0.0117488	0.237147	0	0.00948993	0.0294282
20	21	3	0.123784	0.38748	0.0618304	0.0607292	0.262083	0.0238434	0.0503247	0.0299249
20	21	4	0.0851282	0.76306	0.0265806	0	0.125231	0	0	0
20	21	5	0.0458921	0.500247	0.0545291	0.0274476	0.323303	0	0	0.0485808
20	21	6	0.0550579	0.450927	0.0797309	0.0414224	0.312556	0.0124465	0.0209433	0.0269161
20	21	8	0.0649488	0.504259	0.0708861	0.0637011	0.212891	0.0135471	0.0276842	0.0420833
20	21	9	0.0718457	0.387698	0.0242365	0.0103811	0.496737	0	0	0.00910126
20	21	10	0.0622311	0.573218	0.0689754	0.0538661	0.153724	0.0178686	0.0311433	0.038973
25	1	2	0	0	0	0.0294542	0	0	0	0
25	1	3	0.310661	0	0.0247942	0.214996	0	0	0.12467	0.324879
25	1	4	0	0.807127	0.044899	0.147974	0	0	0	0
25	1	5	0.170964	0	0.0629327	0.0298538	0.211189	0	0.252797	0.272263
25	1	7	0.255929	0.142938	0.241832	0.0222515	0.163878	0.0173154	0.0821039	0.0737522
25	1	8	0.0719944	0.249673	0.027368	0.215133	0	0	0.242833	0.192998
25	1	9	0.468291	0.198203	0.0227153	0.139014	0.0337736	0	0.0496072	0.0883958
25	1	1	0.179517	0.377679	0.0416374	0.12869	0	0.0394714	0.136938	0.0960677
25	1	10	0.471443	0.248501	0.0195582	0.146957	0	0	0.0880915	0.0254494
25	2	1	0.197249	0.591304	0.193776	0	0	0	0.0123644	0.00530636
25	2	2	0.107039	0.517456	0.0375986	0.12101	0.0139749	0	0.0896369	0.113285
25	2	4	0.276566	0.228868	0.0985199	0.0578673	0	0.0500731	0.164683	0.123423
25	2	5	0.368357	0.377918	0.0981467	0.0259558	0	0.0276834	0.0614613	0.0404779
25	2	6	0.284969	0.521656	0.0579142	0.0295342	0.015043	0	0.047939	0.0429448
25	2	7	0.194388	0.433224	0.0419933	0.0961105	0.0111602	0	0.0894022	0.133722
25	2	10	0.375767	0.375767	0.0330152	0.0626377	0	0	0.0621446	0.0906676
25	3	1	0.216366	0.386802	0.13321	0.057123	0	0.0316816	0.111288	0.0635299
25	3	2	0.235821	0.348655	0.140435	0.0792037	0.00992469	0.0368942	0.0885357	0.060531
25	3	3	0.185841	0.447964	0.175159	0.0096628	0.00799947	0.0173928	0.060149	0.0958318
25	3	4	0.282509	0.35176	0.139335	0.0174309	0.0796848	0.0202259	0.0334758	0.0755788
25	3	5	0.223292	0.284604	0.16819	0.0613913	0	0.0356994	0.128051	0.0987721
25	3	6	0.290461	0.288137	0.139039	0.0312873	0.126899	0.0165597	0.0535681	0.0540496
25	3	7	0.221275	0.545104	0.0631982	0.00885897	0	0	0.0332595	0.128305
25	3	8	0.152491	0.518755	0.071127	0.016228	0.113247	0.0198536	0.0420018	0.0662964
25	3	9	0.151906	0.449089	0.0819826	0.042744	0.111027	0.0269602	0.054087	0.0822035
25	3	10	0.269635	0.654127	0.0395805	0.0366578	0	0	0	0
25	4	1	0.233885	0.521966	0.110765	0.0160139	0.0191	0.0153704	0.0320303	0.0508689
25	4	2	0.14395	0.180267	0.367301	0.0342321	0.0879067	0.0268029	0.0930613	0.0664797
25	4	3	0.170984	0.55194	0.10219	0.0137495	0.0555851	0.0192922	0.0310584	0.0552001
25	4	4	0.191728	0.228537	0.322665	0.0401359	0.0337945	0.0258312	0.0985529	0.0587554
25	4	5	0.173966	0.24055	0.0921921	0.0699285	0.102835	0.0481579	0.14998	0.122391
25	4	6	0.212978	0.54552	0.0992379	0.0257055	0	0.0168727	0.0395876	0.0600986
25	4	7	0.495498	0.360784	0.0762046	0.0129355	0	0	0.0254853	0.0290922
25	4	8	0.11484	0.570203	0.0687469	0.0478268	0	0	0.0506609	0.147722
25	4	9	0.130131	0.554298	0.10951	0.00221647	0.141698	0	0.0202845	0.0418621
25	4	10	0.433987	0.406101	0.0720585	0.00683163	0	0	0.0315057	0.0495153
25	5	1	0.272999	0.462636	0.121933	0.0249869	0.00759204	0.0140945	0.0446649	0.0510945
25	5	2	0.186077	0.446038	0.0968961	0.0145021	0.192425	0.00753801	0.0187761	0.0377476
25	5	3	0.173367	0.514714	0.119755	0.014516	0.0553455	0.0143048	0.0317458	0.0762519
25	5	4	0.253485	0.469592	0.102008	0.048697	0.0121347	0.0149013	0.0352199	0.0639622
25	5	5	0.215487	0.541367	0.101576	0.0229063	0.0183446	0.0141606	0.026618	0.0595402
25	5	6	0.204912	0.461587	0.111117	0.0616845	0.00369973	0.0276313	0.0813517	0.0480171
25	5	7	0.176251	0.547398	0.0378268	0.0324435	0	0	0.0446443	0.161437
25	5	8	0.117121	0.485493	0.0715939	0.0562747	0.0871469	0.024517	0.0781911	0.0796628
25	5	9	0.243535	0.492709	0.0749185	0.017788	0.0765965	0.0153227	0.0276883	0.0514417
25	5	10	0.0938629	0.60781	0.0686348	0.0339319	0.0232615	0.0157289	0.0505273	0.106243
25	6	1	0.151978	0.441457	0.0563137	0.0695528	0.0595513	0.0288638	0.0954182	0.096865
25	6	2	0.15593	0.452309	0.0769441	0.0318081	0.227735	0.0115522	0.022473	0.0212483
25	6	3	0.162616	0.351521	0.0953955	0.0116794	0.305489	0.0122852	0.0175009	0.0435136
25	6	4	0.231254	0.334968	0.146646	0.0482991	0.0903374	0.0226651	0.0796207	0.0462091
25	6	5	0.259129	0.409666	0.123499	0.0163815	0.115244	0.0134331	0.0363009	0.0263467
25	6	6	0.285828	0.446012	0.0707636	0.00915158	0.119647	0.0139983	0.0304178	0.0241819
25	6	7	0.161945	0.379446	0.0800483	0.0303522	0.265918	0.0151675	0.026253	0.040869
25	6	8	0.237009	0.519337	0.103214	0.0116426	0.0319056	0.0128844	0.0289516	0.0550559
25	6	9	0.121067	0.523562	0.0887898	0.0119229	0.199006	0.00757413	0.0159626	0.0321154
25	6	10	0.0959141	0.0243667	0.515049	0.0986178	0.0575973	0.027979	0.0689014	0.111574
25	7	1	0.248472	0.430797	0.118699	0.0116251	0.0750458	0.0208538	0.0308148	0.0636918
25	7	2	0.234392	0.489954	0.0851625	0.00999285	0.0706749	0.0145713	0.0241653	0.0710878
25	7	3	0.203775	0.391548	0.0798606	0.0206552	0.224079	0.012024	0.0276811	0.0403765
25	7	4	0.192693	0.352815	0.0896457	0.0251477	0.230922	0.0140675	0.0340507	0.0606583
25	7	5	0.119767	0.478969	0.0985061	0.0308952	0.195163	0.0124546	0.0284374	0.0358079
25	7	6	0.203238	0.557113	0.104011	0.0106319	0.0667875	0.00743806	0.0174164	0.0333647
25	7	7	0.164372	0.422619	0.103876	0.0292643	0.122432	0.0282042	0.0728654	0.0563668
25	7	8	0.0390437	0.960956	0	0	0	0	0	0
25	7	9	0.157688	0.369051	0.0839322	0.0107696	0.330361	0.00525633	0.0147062	0.0282358
25	7	10	0.193715	0.357584	0.059519	0.0444513	0.235376	0.0173784	0.0366107	0.0553648
25	14	1	0.16394	0.543446	0.0542107	0.015595	0.116896	0.0136278	0.030248	0.0620369
25	14	2	0.111962	0.711465	0.0375988	0	0	0	0.0249752	0.113999
25	14	3	0.194764	0.533059	0.0574142	0.0197217	0.106905	0.014038	0.0271903	0.0469078
25	14	4	0.244735	0.715372	0.0358419	0	0.00405103	0	0	0
25	14	5	0.268458	0.485085	0.0852409	0.0283211	0.00863245	0.01869	0.0639291	0.0416425
25	14	6	0.0957831	0.904217	0	0	0	0	0	0
25	14	7	0.155593	0.780728	0.0227991	0.0408802	0	0	0	0
25	14	8	0.172197	0.54646	0.0737742	0.0111584	0.144209	0.00880425	0.0187102	0.0246871
25	14	9	0.195473	0.463355	0.105002	0.0380029	0	0.0299707	0.0900022	0.0781938
25	14	10	0.0875519	0.60344	0.0749412	0.0290981	0.0887034	0.0163226	0.0527982	0.047145
25	21	1	0.182744	0.498934	0.0362162	0.0376434	0.10482	0.0228175	0.0449325	0.0718921
25	21	2	0.150056	0.531904	0.0794266	0.0242267	0.151693	0.00997428	0.0210137	0.0317053
25	21	3	0.206842	0.546027	0.0713512	0.0016451	0.0946587	0.010696	0.0194542	0.0493256
25	21	4	0.185292	0.517349	0.0510056	0.0371361	0.0720181	0.0217707	0.0476367	0.0677919
25	21	5	0.117622	0.363539	0.0703699	0.0114023	0.322974	0.0164366	0.0484792	0.049177
25	21	6	0.209314	0.59089	0.0517999	0.0172177	0.0368611	0.00945968	0.0217081	0.0627489
25	21	7	0.1923	0.424879	0.0805496	0.063833	0.0841309	0.0252061	0.074575	0.0545257
25	21	8	0.1923	0.424879	0.0805496	0.063833	0.0841309	0.0252061	0.074575	0.0545257
25	21	9	0.132452	0.383294	0.0782052	0.0454391	0.227644	0.0217346	0.0599779	0.0512532
25	21	10	0.100226	0.636264	0.0993147	0.0238348	0.0764692	0.00922647	0.0225416	0.0321232
30	1	3	0.243229	0.467996	0.0860982	0.00248629	0.0175155	0	0.0833566	0.0993188
30	1	4	0.110801	0.314379	0.0446145	0.0919772	0	0	0.231117	0.207111
30	1	5	0.0678752	0.425115	0.0477785	0.0370461	0	0	0.145754	0.276431
30	1	6	0.0809444	0.24134	0.213351	0.0251461	0.303246	0.0154208	0.0698051	0.0507461
30	1	7	0.152564	0.360225	0.0646932	0.0543427	0.0569352	0	0.199181	0.112059
30	1	8	0.0704258	0.313507	0.0538699	0.0295984	0.141274	0	0.179106	0.212218
30	1	10	0.348566	0.377781	0.0347634	0.00537373	0.0978122	0	0.0642725	0.0714312
30	1	1	0.358342	0.249877	0.134707	0.0219386	0	0.0213045	0.112084	0.101746
30	1	2	0.222334	0	0.0473328	0.0728922	0.24409	0	0.248366	0.164985
30	2	2	0.179725	0.367283	0.0331	0.0111057	0.269637	0	0.0563771	0.0827717
30	2	3	0.178422	0.545813	0.0895082	0.00920061	0	0	0.0528368	0.124219
30	2	4	0.310977	0.434391	0.128488	0.0212632	0	0.0130495	0.0500772	0.0417539
30	2	6	0.0994565	0.271449	0.0686738	0.0489284	0.178667	0.0253521	0.175826	0.131648
30	2	8	0.207161	0.370007	0.0866761	0.00939025	0.243265	0.00902871	0.0314649	0.0430069
30	2	9	0.155812	0.370453	0.144686	0.0166823	0.0967867	0	0.0589289	0.156651
30	2	10	0.346916	0.429551	0.093066	0.00373497	0.0289616	0.010541	0.0384279	0.0488015
30	3	4	0.161679	0.444069	0.0824451	0.0216308	0.0908385	0.0225057	0.0773574	0.0994746
30	3	5	0.207198	0.341613	0.0940922	0.0192462	0.241992	0.0101415	0.0352138	0.0505028
30	3	7	0.159405	0.463668	0.111695	0.0215256	0.13398	0.0134368	0.0398012	0.0564882
30	3	8	0.227391	0.417761	0.105161	0.0314749	0.070771	0.0225348	0.0678104	0.0570956
30	3	9	0.192835	0.512052	0.129638	0.00825105	0.0340718	0.0141722	0.0392424	0.0697381
30	3	10	0.170471	0.31801	0.149702	0.0647897	0.0288025	0.040994	0.104263	0.122967
30	4	1	0.0920142	0.391871	0.0884203	0.0179219	0.331502	0.00775381	0.0302071	0.0403097
30	4	2	0.129571	0.440568	0.0851564	0.00765062	0.305121	0	0.0112744	0.0206586
30	4	3	0.163492	0.386897	0.124269	0.0300354	0.0982074	0.0293589	0.0825887	0.0851517
30	4	4	0.295135	0.396484	0.0998392	0.0332393	0	0.0285332	0.0637913	0.0829781
30	4	5	0.157387	0.530939	0.0593251	0.0387863	0.0568741	0	0.0621606	0.0945277
30	4	6	0.164486	0.300935	0.0773021	0.00542772	0.366479	0	0.0263731	0.0589968
30	4	7	0.0984701	0.342882	0.106877	0.00424561	0.336458	0	0.0512069	0.0598604
30	4	8	0.261219	0.399709	0.0753076	0.00354226	0.172723	0.00889604	0.0307814	0.047822
30	4	9	0.105804	0.29397	0.12187	0.00163381	0.393404	0	0.0316456	0.0516719
30	4	10	0.20709	0.597665	0.0830538	0.0111376	0	0	0.0309665	0.0700876
30	5	1	0.287733	0.366371	0.0795185	0.0166041	0.0421432	0.0247674	0.0862254	0.0966373
30	5	2	0.0642144	0.306016	0.104316	0.0176471	0.291726	0.0231129	0.0798904	0.113077
30	5	3	0.327813	0.425313	0.0691739	0.00605293	0.0438052	0	0.0486769	0.0791658
30	5	4	0.154561	0.667597	0.0398323	0.00722896	0.0545097	0.0099502	0.0172868	0.0490336
30	5	5	0.14546	0.538029	0.102111	0	0.114447	0	0.0150468	0.0849051
30	5	6	0.161946	0.217251	0.360178	0.0496777	0.040428	0.0257238	0.088211	0.0565846
30	5	7	0.168629	0.45918	0.0859508	0.0239302	0.0187273	0.0309948	0.0849392	0.127648
30	5	8	0.0378749	0.630363	0.0641831	0.00650242	0.080445	0	0.0459442	0.134687
30	5	9	0.0882297	0.434356	0.105304	0.0169948	0.248123	0.01003	0.039908	0.0570533
30	5	10	0.125562	0.178902	0.0863093	0	0.609226	0	0	0
30	6	1	0.0807033	0.495079	0.095966	0.000716565	0.12417	0.0312398	0.060871	0.111254
30	6	2	0.168265	0.461402	0.0959509	0.0178591	0.115211	0.0196635	0.0535456	0.0681029
30	6	3	0.126129	0.343093	0.0289238	0.00308225	0.462479	0	0	0.0362931
30	6	4	0.0630546	0.657882	0	0	0.194543	0	0.0334785	0.0510423
30	6	5	0.20281	0.469932	0.0581365	0.00625182	0.139851	0	0.0335206	0.0894987
30	6	6	0.150431	0.547285	0.0506007	0.0120318	0.1412	0	0.0385299	0.0599216
30	6	7	0.096128	0.306028	0.0577212	0.00799504	0.425332	0.0133847	0.04764	0.0457714
30	6	8	0.152452	0.283163	0.0315811	0.0026139	0.476606	0	0.0127242	0.0408598
30	6	9	0.0686969	0.462456	0.0891936	0.0056138	0.343012	0.00518829	0.0110679	0.0147711
30	6	10	1	0	0	0	0	0	0	0
30	7	2	0.291438	0.116671	0	0	0.571681	0	0	0.0202094
30	7	3	0.100008	0.378426	0.136367	0.0140691	0.262812	0	0.0260218	0.0822964
30	7	4	0.199706	0.555365	0.117849	0.000997752	0.0427133	0.0416583	0.0106744	0.0310365
30	7	5	0.175339	0.479969	0.0877954	0.0260021	0.0455192	0.0208816	0.0727431	0.0917505
30	7	6	0.134954	0.551267	0.152413	0.0141028	0.0862081	0.00905399	0.0232357	0.0287659
30	7	7	0.24416	0.467961	0.196555	0.00184085	0.0260009	0.00866046	0.0254074	0.029415
30	7	8	0.115726	0.290965	0.319232	0.023434	0.16279	0.0115466	0.0327619	0.043545
30	7	9	0.109511	0.234191	0.10715	0	0.475211	0.00770912	0.0201097	0.0461181
30	7	10	0.156189	0.450155	0.12684	0.0102207	0.0839772	0	0.0442658	0.128353
30	14	1	0.196262	0.502859	0.0895037	0.00023669	0.145129	0	0.0156215	0.0503883
30	14	2	0.152935	0.35296	0.0817981	0.0201965	0.280494	0.0155589	0.0444351	0.0516233
30	14	3	0.169021	0.435542	0.0851778	0.007739	0.174222	0.0152637	0.0344862	0.0785487
30	14	4	0.222361	0.375143	0.103978	0.0258458	0.147992	0.0169803	0.0619854	0.0457146
30	14	5	0.290563	0.417435	0	0	0.292002	0	0	0
30	14	6	0.11803	0.530429	0.0892059	0.0140156	0.183094	0.00832884	0.0238979	0.0329988
30	14	7	0.0913727	0.503009	0.101796	0.0282542	0.0470764	0.0296719	0.10444	0.0943802
30	14	8	0.0665141	0.481845	0.0705314	0.00758311	0.270332	0.0102361	0.032114	0.0608436
30	14	9	0.129519	0.492938	0.123888	0.0190481	0.0245576	0.025468	0.0945227	0.0900588
30	14	10	0.111621	0.473359	0.145027	0	0.118212	0	0.0575767	0.0942036
30	21	1	0.144929	0.61221	0.120668	0	0.122193	0	0	0
30	21	2	0.139954	0.243858	0.0195267	0.0142199	0.43556	0.0113957	0.0443909	0.0910948
30	21	3	0.518902	0.307486	0.0780458	0	0	0	0	0.0955663
30	21	4	0.132128	0.467983	0.0656912	0.0232173	0.199721	0.0129898	0.0360305	0.0622396
30	21	5	0.154924	0.317882	0.0514658	0.00165578	0.440152	0	0.00532587	0.0285952
30	21	6	0.0953594	0.113021	0.375476	0.0393863	0.185531	0.0257029	0.100159	0.0653645
30	21	7	0.177775	0.268844	0.0246104	0.00446136	0.524309	0	0	0
30	21	8	0.0542715	0.0117021	0.511197	0.0297841	0.164833	0.0296033	0.117757	0.0808523
30	21	9	0.0922496	0.728407	0.0565873	0	0.0605391	0	0.00999014	0.0522263
30	21	10	0.139777	0.435359	0.0563609	0.00123166	0.337771	0	0.00695949	0.0225411
35	1	1	0.201103	0.243741	0.0293702	0.0430085	0.308067	0	0.0540368	0.120675
35	1	2	0.16401	0.485211	0.0490027	0.0463754	0.255401	0	0	0
35	1	3	0.117243	0.385222	0.130707	0.00923386	0.114333	0	0.0863732	0.156888
35	1	4	0.399872	0.225089	0.0542016	0.0496926	0.15663	0	0.0484341	0.0660799
35	1	5	0.173297	0.0619595	0.0341333	0.00468744	0.640575	0	0.0370075	0.0483399
35	1	6	0.271003	0.225544	0.0751324	0	0.428321	0	0	0
35	1	7	0.0778564	0.267994	0.292582	0.0182824	0.0244179	0.0339448	0.152932	0.13199
35	1	8	0.333714	0.250056	0.0422015	0.0261063	0.222583	0	0.0376234	0.0877155
35	1	10	0.0951671	0.409782	0.0566692	0.025334	0.138341	0	0.126194	0.148513
35	2	1	0.21865	0.255639	0.157165	0	0.295082	0	0	0.0734645
35	2	2	0.474978	0.159288	0.105462	0.0148345	0.201374	0	0.0294191	0.0146436
35	2	3	0.0625306	0.474187	0.0963783	0.0363331	0.140849	0.0295048	0.0808465	0.0793703
35	2	4	0.150772	0.420287	0.037266	0.0428604	0.256434	0	0.0549909	0.0373898
35	2	5	0.154332	0.556745	0.2106	0	0.0783225	0	0	0
35	2	7	0.23128	0.394965	0.135881	0.0340264	0.0421815	0.0183669	0.0582902	0.0850095
35	2	9	0.214105	0.176486	0.364026	0.0415828	0.00607336	0.0260933	0.108699	0.0629342
35	2	10	0.192893	0.564318	0.171967	0.00394544	0.0203276	0.00482088	0.0285525	0.0131754
35	3	1	0.147526	0.239198	0.17297	0.0181953	0.303523	0.0144479	0.0598302	0.0443099
35	3	2	0.0683398	0.485495	0.16326	0.0145029	0.0449144	0	0	0.223488
35	3	3	0.145336	0.18062	0.0205655	0	0.570336	0	0.0203856	0.0627559
35	3	4	0.140359	0.556872	0.30277	0	0	0	0	0
35	3	5	0.23014	0.376841	0.131935	0.0267013	0.0389237	0.0159383	0.0805999	0.0989206
35	3	6	0.208431	0.376427	0.0524246	0.0388569	0.227338	0	0.0296561	0.0668666
35	3	7	0.120866	0.479844	0.0622777	0.0348684	0.19095	0	0.0375861	0.0736073
35	3	8	0.103965	0.4377	0.128457	0.0157446	0.212361	0	0.0489217	0.0528507
35	3	9	0.113396	0.346339	0.082616	0.00578822	0.324925	0.0137547	0.0366229	0.0765582
35	4	1	0.206414	0.595715	0.0827828	0.0111013	0.00326321	0	0.0308655	0.0698589
35	4	2	0.132102	0.336899	0.100599	0.0102276	0.315405	0.00481594	0.0415488	0.0584019
35	4	3	0.152828	0.454702	0.130231	0.0401084	0	0.0275758	0.0871882	0.107367
35	4	4	0.225257	0.56498	0.124943	0.00120404	0.0018721	0	0.0232685	0.0584744
35	4	5	0.191815	0.505465	0.104334	0.0513206	0	0	0.0535853	0.0934805
35	4	6	0.285613	0.484884	0.0794819	0.0179998	0.0200521	0	0.0415047	0.0704654
35	4	7	0.0859095	0.528196	0.105385	0.00808789	0.0938711	0	0.0592402	0.119311
35	4	8	0.198668	0.383238	0.0905939	0.0292344	0.142074	0.0113554	0.0985646	0.0462708
35	4	9	0.125961	0.380474	0.0780703	0.0129955	0.339398	0	0.0263547	0.0367461
35	4	10	0.138025	0.304712	0.0587493	0	0.445937	0	0.0144258	0.0381509
35	5	1	0.210808	0.538149	0.0891064	0.00483966	0.0847037	0	0.0112786	0.0611145
35	5	2	0.250516	0.338744	0.163123	0	0.161523	0	0	0.0860933
35	5	3	1	0	0	0	0	0	0	0
35	5	4	0.0982894	0.266895	0.156041	0.0209025	0.318485	0.0108109	0.0554451	0.0731308
35	5	5	0.173972	0.403877	0.0148016	0.0325035	0.182027	0	0.095504	0.0973145
35	5	6	0.271552	0.371679	0.137803	0.00105369	0.091688	0	0.0331494	0.0930748
35	5	7	0.0499434	0.442262	0.234031	0	0.0565115	0	0.0658388	0.151414
35	5	8	0.183836	0.524188	0.118029	0	0.109026	0	0.0262835	0.0386376
35	5	9	0.235065	0.399738	0	0	0.207088	0.00293733	0.0144599	0.140712
35	6	1	0.118974	0.374592	0.0677391	0.00532099	0.391486	0	0.0168774	0.0250104
35	6	2	0.0652444	0.539471	0.102077	0.00847063	0.179712	0	0.0318593	0.0731652
35	6	3	0.0476501	0.526847	0.0553965	0.0310129	0.247859	0	0.0249968	0.0662379
35	6	5	0.108825	0.216296	0.0462921	0.00381435	0.574206	0	0.0199275	0.0306393
35	6	6	0.316082	0	0	0.219093	0.464825	0	0	0
35	6	7	0.0762875	0.332053	0.0514516	0.0141696	0.421236	0	0.0474476	0.057354
35	6	8	0.166316	0.375257	0.106794	0.0122	0.252466	0	0.0377237	0.0492438
35	6	9	0.169075	0.341186	0.0589919	0.0535149	0.243672	0	0.0472442	0.0863159
35	6	10	0.123054	0.507204	0.130331	0	0.181976	0	0.0173123	0.040123
35	7	1	0.198148	0.489397	0.105197	0.00388619	0.0836036	0.0117512	0.0410015	0.0670149
35	7	3	0.253351	0.369934	0.064582	0.00904611	0.121672	0	0.0485003	0.132915
35	7	4	0.200436	0.519644	0.107205	0.000655895	0.0941913	0.00660564	0.0170119	0.0542505
35	7	5	0.187721	0.569238	0.107042	0.000573978	0.0620497	0.0101523	0.0163351	0.0468878
35	7	6	0.0748976	0.11032	0	0	0.814782	0	0	0
35	7	7	0.130263	0.464489	0.159066	0.00755927	0.106396	0.022674	0.0356111	0.0739412
35	7	8	0	0	0	0	1	0	0	0
35	7	9	0.169519	0.232036	0.0664543	0.00733752	0.440895	0.00833233	0.032518	0.0429083
35	14	1	0.105899	0.460146	0.0839517	0.00495925	0.271157	0	0.0138988	0.059989
35	14	2	0.0725915	0.40291	0.0676155	0.0230813	0	0.0512923	0.164309	0.2182
35	14	3	0.109304	0.320832	0.0719562	0.00163374	0.470247	0	0.00360737	0.0224202
35	14	4	0.0817911	0.308472	0.126785	0.00395763	0.366331	0.0119933	0.0342823	0.0663874
35	14	6	0.0931648	0.395213	0.0399747	0.00149409	0.470154	0	0	0
35	14	7	0.201461	0.798539	0	0	0	0	0	0
35	14	8	0.137007	0.475854	0.0938052	0.0246798	0.0553534	0.0168099	0.092969	0.103521
35	14	9	0.071262	0.438582	0.0436644	0.0285199	0.216656	0	0.0654137	0.135902
35	14	10	0.210789	0.429183	0.0524195	0.00284851	0.191376	0	0.0375198	0.0758649
35	21	6	0.0999394	0.413107	0	0	0.287227	0	0	0.199727
35	21	7	0.12251	0.623236	0.0946312	0	0.0555064	0	0.0206871	0.0834294
35	21	8	0.0603378	0.174118	0.256217	0.0175129	0.343101	0.0104985	0.108956	0.029258
35	21	9	0.105834	0.411629	0.0334425	0.0223864	0.272391	0.0160957	0.0402927	0.0979286
35	21	10	0.131133	0.396989	0.036824	0.00208284	0.370441	0	0.00821072	0.0543197
40	1	5	0.171112	0.0832984	0.0496049	0.00749157	0.667892	0	0.0116757	0.00892522
40	1	6	0.135021	0.244082	0.028515	0	0.592381	0	0	0
40	2	7	0.17179	0	0	0	0.82821	0	0	0
40	3	1	0.069424	0	0.315084	0	0.615492	0	0	0
40	3	2	0.147677	0.276724	0.0545408	0.00242827	0.413614	0	0.0591399	0.0458757
40	3	4	1	0	0	0	0	0	0	0
40	3	5	0.0820368	0.404645	0.0564816	0.027801	0.140988	0	0.220169	0.0678793
40	3	8	1	0	0	0	0	0	0	0
40	4	1	0.084207	0.420795	0	0.0544582	0.340356	0	0.100184	0
40	4	2	0.104739	0.447745	0.0112741	0	0.436242	0	0	0
40	4	5	0	0	0	0	1	0	0	0
40	4	7	0.135332	0.67317	0	0.191499	0	0	0	0
40	4	8	0	0	0	0	1	0	0	0
40	4	9	0.101396	0.351914	0.0432707	0.0113175	0.420125	0.0719767	0	0
40	4	10	0.127111	0.188377	0.0315577	0.00760006	0.553679	0	0.036314	0.0553611
40	5	1	0.0970798	0.39552	0.0239858	0.0132179	0.241459	0	0.0650209	0.163717
40	5	2	0.131583	0.191404	0	0	0.620269	0	0	0.0567452
40	5	4	0.0652897	0.253526	0	0	0.118204	0.0395268	0.301187	0.222267
40	5	5	0.0553051	0.242666	0.0411023	0.00736413	0.473953	0.0124027	0.049533	0.117674
40	5	6	0.0996617	0.269155	0.0236539	0.00608918	0.467947	0	0.0418845	0.0916089
40	5	8	0.120405	0.474809	0	0	0.141051	0	0.0398161	0.223919
40	5	9	0	0	0	0	0	0	0.681854	0.318146
40	6	2	0.0881719	0.34893	0.0154255	0.00782023	0.295456	0	0.11961	0.124586
40	6	3	0.120127	0.0844556	0	0	0.701848	0.00662174	0.0382745	0.0486731
40	6	4	0.087492	0.302383	0.0259939	0.0121956	0.155627	0	0.234155	0.182153
40	6	5	1	0	0	0	0	0	0	0
40	6	6	0.0804282	0.219967	0	0	0.275626	0	0.331955	0.0920238
40	6	7	0.115812	0.657167	0	0	0.156847	0	0.0701738	0
40	6	8	0	1	0	0	0	0	0	0
40	6	9	0.116142	0.0991231	0	0	0.76332	0	0	0.0214142
40	6	10	0.145931	0.270722	0	0	0.443436	0.0124631	0.0425742	0.0848733
40	7	1	0.0965032	0.407634	0	0	0.472301	0	0	0.0235616
40	7	2	0.0904004	0.106676	0	0	0.802923	0	0	0
40	7	4	0.120635	0.415893	0	0	0.423213	0.0402591	0	0
40	7	5	0.0703956	0.30206	0	0	0.449886	0	0.0392533	0.138405
40	7	6	0.237168	0	0	0	0.762832	0	0	0
40	7	7	0.194058	0	0	0.152111	0.367667	0	0.286164	0
40	7	8	0.126751	0.228558	0.0309955	0.00145964	0.554629	0	0.0148333	0.042773
40	7	9	0.0876839	0.30133	0	0	0.455769	0	0.0427567	0.11246
40	7	10	0.105446	0.187177	0	0	0.642113	0	0.0108419	0.0544221
40	14	4	0.130282	0	0	0	0.869718	0	0	0
40	14	6	0.175298	0.512095	0	0.0349607	0.24524	0	0.0324065	0
40	14	7	0.0783043	0.307646	0	0	0.210879	0	0.256704	0.146467
40	14	9	0.0908421	0.274335	0	0	0.634822	0	0	0
40	21	9	0.0827875	0.352752	0	0	0.507846	0	0	0.056614

## Sheet: GLMM_yes_no
TEMP	DAY	dry_weight	reg_yes	reg_no
15	1	33	0	1
15	1	29	0	1
15	1	24	0	1
15	1	24	0	1
15	1	21	0	1
15	1	27	0	1
15	1	24	1	0
15	1	35	1	0
15	1	44	1	0
15	1	26	1	0
20	1	36	0	1
20	1	19	0	1
20	1	21	0	1
20	1	37	0	1
20	1	26	1	0
20	1	38	1	0
20	1	30	1	0
20	1	35	1	0
20	1	38	1	0
20	1	23	1	0
25	1	39	1	0
25	1	29	1	0
25	1	39	1	0
25	1	40	1	0
25	1	33	1	0
25	1	28	1	0
25	1	36	1	0
25	1	44	1	0
25	1	26	1	0
30	1	44	1	0
30	1	40	1	0
30	1	34	1	0
30	1	33	1	0
30	1	39	1	0
30	1	42	1	0
30	1	36	1	0
30	1	26	1	0
30	1	26	1	0
35	1	31	1	0
35	1	33	1	0
35	1	33	1	0
35	1	38	1	0
35	1	30	1	0
35	1	35	1	0
35	1	26	1	0
35	1	34	1	0
35	1	33	1	0
40	1	26	1	0
40	1	26	0	1
40	1	26	0	1
40	1	21	1	0
40	1	23	0	1
15	2	19	0	1
15	2	31	0	1
15	2	32	1	0
15	2	20	1	0
15	2	34	1	0
15	2	29	1	0
15	2	23	1	0
15	2	40	1	0
15	2	24	1	0
20	2	34	0	1
20	2	31	1	0
20	2	28	1	0
20	2	31	1	0
20	2	36	1	0
20	2	35	1	0
20	2	32	1	0
25	2	40	1	0
25	2	39	1	0
25	2	46	1	0
25	2	50	1	0
25	2	40	1	0
25	2	49	1	0
25	2	29	1	0
30	2	25	0	1
30	2	47	1	0
30	2	37	1	0
30	2	60	1	0
30	2	34	1	0
30	2	39	1	0
30	2	39	1	0
30	2	38	1	0
35	2	34	1	0
35	2	33	1	0
35	2	31	1	0
35	2	41	1	0
35	2	36	1	0
35	2	34	1	0
35	2	36	1	0
35	2	38	1	0
40	2	17	0	1
40	2	20	0	1
40	2	18	1	0
40	2	21	0	1
40	2	26	0	1
15	3	24	0	1
15	3	18	0	1
15	3	29	1	0
15	3	28	1	0
15	3	23	1	0
15	3	29	1	0
15	3	32	1	0
15	3	22	1	0
15	3	32	1	0
15	3	23	1	0
20	3	32	1	0
20	3	43	1	0
20	3	45	1	0
20	3	39	1	0
20	3	44	1	0
20	3	41	1	0
20	3	23	1	0
20	3	37	1	0
25	3	50	1	0
25	3	40	1	0
25	3	33	1	0
25	3	32	1	0
25	3	49	1	0
25	3	37	1	0
25	3	50	1	0
25	3	45	1	0
25	3	47	1	0
25	3	28	1	0
30	3	33	1	0
30	3	32	1	0
30	3	25	1	0
30	3	29	1	0
30	3	36	1	0
30	3	30	1	0
35	3	15	0	1
35	3	34	1	0
35	3	34	1	0
35	3	33	1	0
35	3	22	1	0
35	3	35	1	0
35	3	21	1	0
35	3	32	1	0
35	3	30	1	0
35	3	31	1	0
40	3	20	0	1
40	3	21	1	0
40	3	23	0	1
40	3	22	0	1
40	3	19	1	0
40	3	26	0	1
40	3	20	0	1
40	3	29	0	1
40	3	25	0	1
15	4	25	0	1
15	4	19	0	1
15	4	28	0	1
15	4	27	0	1
15	4	25	0	1
15	4	28	1	0
15	4	27	1	0
15	4	28	1	0
15	4	35	1	0
15	4	31	1	0
20	4	32	1	0
20	4	31	1	0
20	4	42	1	0
20	4	44	1	0
20	4	38	1	0
20	4	57	1	0
20	4	41	1	0
20	4	47	1	0
20	4	29	1	0
20	4	38	1	0
25	4	55	1	0
25	4	58	1	0
25	4	34	1	0
25	4	53	1	0
25	4	55	1	0
25	4	28	1	0
25	4	47	1	0
25	4	53	1	0
25	4	30	1	0
25	4	40	1	0
30	4	26	1	0
30	4	25	1	0
30	4	34	1	0
30	4	26	1	0
30	4	38	1	0
30	4	39	1	0
30	4	37	1	0
30	4	38	1	0
30	4	24	1	0
30	4	36	1	0
35	4	34	1	0
35	4	33	1	0
35	4	25	1	0
35	4	28	1	0
35	4	27	1	0
35	4	33	1	0
35	4	28	1	0
35	4	28	1	0
35	4	39	1	0
35	4	34	1	0
40	4	25	1	0
40	4	24	1	0
40	4	22	0	1
40	4	23	0	1
40	4	22	1	0
40	4	21	0	1
40	4	17	1	0
40	4	14	0	1
40	4	18	1	0
40	4	19	1	0
15	5	18	0	1
15	5	25	0	1
15	5	31	1	0
15	5	25	1	0
15	5	23	1	0
15	5	27	1	0
15	5	37	1	0
15	5	35	1	0
15	5	27	1	0
15	5	23	1	0
20	5	31	1	0
20	5	23	1	0
20	5	48	1	0
20	5	26	1	0
20	5	27	1	0
20	5	34	1	0
20	5	30	1	0
20	5	33	1	0
20	5	28	1	0
20	5	31	1	0
25	5	35	1	0
25	5	41	1	0
25	5	48	1	0
25	5	53	1	0
25	5	43	1	0
25	5	45	1	0
25	5	47	1	0
25	5	47	1	0
25	5	49	1	0
25	5	48	1	0
30	5	24	1	0
30	5	27	1	0
30	5	29	1	0
30	5	29	1	0
30	5	31	1	0
30	5	36	1	0
30	5	26	1	0
30	5	28	1	0
30	5	19	1	0
30	5	40	1	0
35	5	25	0	1
35	5	22	1	0
35	5	36	1	0
35	5	31	1	0
35	5	21	1	0
35	5	32	1	0
35	5	25	1	0
35	5	25	1	0
35	5	31	1	0
35	5	17	1	0
40	5	14	1	0
40	5	18	1	0
40	5	16	0	1
40	5	23	1	0
40	5	17	1	0
40	5	15	1	0
40	5	16	0	1
40	5	15	1	0
40	5	18	1	0
40	5	10	0	1
15	6	21	0	1
15	6	28	0	1
15	6	27	0	1
15	6	19	1	0
15	6	33	1	0
15	6	37	1	0
15	6	24	1	0
15	6	18	1	0
15	6	23	1	0
15	6	19	1	0
20	6	24	1	0
20	6	18	1	0
20	6	19	1	0
20	6	25	1	0
20	6	31	1	0
20	6	19	1	0
20	6	42	1	0
20	6	35	1	0
20	6	16	1	0
20	6	30	1	0
25	6	32	1	0
25	6	28	1	0
25	6	53	1	0
25	6	30	1	0
25	6	29	1	0
25	6	48	1	0
25	6	32	1	0
25	6	30	1	0
25	6	42	1	0
25	6	41	1	0
30	6	20	1	0
30	6	28	1	0
30	6	36	1	0
30	6	20	1	0
30	6	30	1	0
30	6	18	1	0
30	6	22	1	0
30	6	32	1	0
30	6	36	1	0
30	6	14	1	0
35	6	23	0	1
35	6	24	1	0
35	6	25	1	0
35	6	15	1	0
35	6	28	1	0
35	6	24	1	0
35	6	24	1	0
35	6	24	1	0
35	6	29	1	0
35	6	18	1	0
40	6	17	0	1
40	6	15	1	0
40	6	19	1	0
40	6	11	1	0
40	6	12	0	1
40	6	13	1	0
40	6	17	1	0
40	6	18	1	0
40	6	14	1	0
40	6	18	1	0
15	7	21	0	1
15	7	25	0	1
15	7	20	0	1
15	7	16	0	1
15	7	17	1	0
15	7	27	1	0
15	7	32	1	0
15	7	22	1	0
15	7	19	1	0
15	7	19	1	0
20	7	16	0	1
20	7	29	1	0
20	7	39	1	0
20	7	51	1	0
20	7	37	1	0
20	7	43	1	0
20	7	33	1	0
20	7	43	1	0
20	7	21	1	0
20	7	27	1	0
25	7	26	1	0
25	7	29	1	0
25	7	30	1	0
25	7	45	1	0
25	7	47	1	0
25	7	24	1	0
25	7	40	1	0
25	7	33	1	0
25	7	43	1	0
25	7	38	1	0
30	7	21	1	0
30	7	36	1	0
30	7	34	1	0
30	7	38	1	0
30	7	20	1	0
30	7	22	1	0
30	7	41	1	0
30	7	39	1	0
30	7	34	1	0
35	7	17	0	1
35	7	28	1	0
35	7	29	1	0
35	7	33	1	0
35	7	12	1	0
35	7	24	1	0
35	7	26	1	0
35	7	27	1	0
35	7	26	1	0
40	7	15	1	0
40	7	15	1	0
40	7	16	0	1
40	7	12	1	0
40	7	13	1	0
40	7	4	1	0
40	7	6	0	1
40	7	4	1	0
40	7	4	1	0
40	7	14	1	0
15	14	21	0	1
15	14	18	0	1
15	14	25	0	1
15	14	17	0	1
15	14	22	0	1
15	14	27	1	0
15	14	20	1	0
15	14	32	1	0
15	14	17	1	0
15	14	18	1	0
20	14	41	1	0
20	14	33	1	0
20	14	29	1	0
20	14	31	1	0
20	14	32	1	0
20	14	26	1	0
20	14	32	1	0
20	14	38	1	0
20	14	37	1	0
20	14	26	1	0
25	14	42	1	0
25	14	26	1	0
25	14	28	1	0
25	14	25	1	0
25	14	24	1	0
25	14	28	1	0
25	14	29	1	0
25	14	42	1	0
25	14	22	1	0
25	14	26	1	0
30	14	34	1	0
30	14	20	1	0
30	14	33	1	0
30	14	36	1	0
30	14	29	1	0
30	14	31	1	0
30	14	32	1	0
30	14	28	1	0
30	14	34	1	0
30	14	41	1	0
35	14	16	0	1
35	14	23	1	0
35	14	20	1	0
35	14	23	1	0
35	14	19	1	0
35	14	21	1	0
35	14	13	1	0
35	14	17	1	0
35	14	20	1	0
35	14	16	1	0
40	14	11	0	1
40	14	13	0	1
40	14	13	0	1
40	14	10	0	1
40	14	14	0	1
40	14	6	1	0
40	14	5	1	0
40	14	17	0	1
40	14	13	1	0
40	14	13	0	1
15	21	20	0	1
15	21	20	0	1
15	21	21	0	1
15	21	17	0	1
15	21	21	0	1
15	21	19	1	0
15	21	19	1	0
15	21	20	1	0
15	21	22	1	0
15	21	21	1	0
20	21	28	0	1
20	21	21	0	1
20	21	22	1	0
20	21	30	1	0
20	21	27	1	0
20	21	34	1	0
20	21	30	1	0
20	21	42	1	0
20	21	32	1	0
20	21	39	1	0
25	21	32	1	0
25	21	36	1	0
25	21	29	1	0
25	21	29	1	0
25	21	17	1	0
25	21	30	1	0
25	21	17	1	0
25	21	38	1	0
25	21	25	1	0
25	21	26	1	0
30	21	37	1	0
30	21	22	1	0
30	21	21	1	0
30	21	27	1	0
30	21	36	1	0
30	21	18	1	0
30	21	16	1	0
30	21	25	1	0
30	21	23	1	0
35	21	16	1	0
35	21	14	1	0
35	21	14	1	0
35	21	11	1	0
35	21	24	1	0
40	21	12	0	1
40	21	13	0	1
40	21	11	1	0
40	21	9	0	1

## Sheet: Dry_weight
Mean dry weight data and boxplot
TEMP	mean_weight	SD_weight
#15°C:	25.022	0.627
#20°C:	32.612	0.889
#25°C:	37.419	1.05
#30°C:	30.815	0.887
#35°C:	26.667	0.808
#40°C:	17.301	0.684

## Sheet: R_Script
### Temperature affects chemical defensive secretion biochemistry and alters predator-prey dynamics ###
### code by Christoph Merkel & Adrian Brueckner (lastest version: August 2018), based on code by B.C. Rall (Heethoff and Rall 2015, Chemoecology)
rm(list=ls())
require(effects)
require(car)
require(lme4)
require(multcomp)
require(deSolve)
require(DHARMa)
require(MuMIn)
#Load data
setwd("C:/User/NN/your_directory/")
data1 <- read.table("./amount_data.csv", header=T, sep=",", dec=".")
head(data1)
ds_15 = subset(data1, TEMP=="15")
ds_20 = subset(data1, TEMP=="20")
ds_25 = subset(data1, TEMP=="25")
ds_30 = subset(data1, TEMP=="30")
ds_35 = subset(data1, TEMP=="35")
ds_40 = subset(data1, TEMP=="40")
### Amount TEMP & DAY
#statistics
m1<-glm(amount)~TEMP+I(TEMP^2)+DAY, family=gaussian, data=data1)
summary(m1)
anova(m1)
hist(resid(m1))
plot(m1)
qqnorm(resid(m1))
qqline(resid(m1))
### regeneration yes/no data
data2 <- read.table("./GLMM_yes_no.csv", header=T, sep=",", dec=".")
head(data2)
reg<-cbind(data2$reg_yes, data2$reg_no)
head(reg)
data2$DAY=as.factor(data2$DAY)
m2<-glmer(reg~TEMP+I(TEMP^2)+(1 | DAY), family=binomial, data=data2)
summary(m2)
plot(allEffects(m2), ylab="regenerating individuals [%]", xlab="temperature [°C]")
r.squaredGLMM(m2)
dispersion_glmer(m2)
simulationOutput <- DHARMa::simulateResiduals(fittedModel = m2, n = 250)
plotSimulatedResiduals(simulationOutput = simulationOutput)
testUniformity(simulationOutput = simulationOutput)
testOverdispersion(simulationOutput = simulationOutput)
#### Fitting reg curves ####
#reg 15
data1$Summe<-data1$amount
data1$time<-data1$DAY
ds_glands0=subset(data1, TEMP=="15")
str(ds_glands0)
ds_glands0$def = ds_glands0$Summe
ds_glands0$t = ds_glands0$time
ds_glands = subset(ds_glands0, amount>0.01)
ds_glands$log10.def <- log10((ds_glands$def+1))
shapiro.test(ds_glands$def)
shapiro.test(ds_glands$log10.def)
#m2 = nls(def ~ (-cc*1+cc*1*exp(rS*t/cc)+0)/exp(rS*t/cc),
start = list(cc = 0.2 , rS = 0.2),trace=TRUE,
data = ds_glands)
m2 = nls(log10.def ~ log10((-cc*1+cc*1*exp(rS*t/cc)+0)/exp(rS*t/cc)),
start = list(cc=0.1 , rS=0.1 ),trace=TRUE,
data = ds_glands)
summary(m2)
#reg_20
data1$Summe<-data1$amount
data1$time<-data1$DAY
ds_glands0=subset(data1, TEMP=="20")
str(ds_glands0)
ds_glands0$def = ds_glands0$Summe
ds_glands0$t = ds_glands0$time
ds_glands = subset(ds_glands0, amount>0.01)
ds_glands$log10.def <- log10((ds_glands$def+1))
shapiro.test(ds_glands$def)
shapiro.test(ds_glands$log10.def)
#m2 = nls(def ~ (-cc*1+cc*1*exp(rS*t/cc)+0)/exp(rS*t/cc),
start = list(cc = 0.2 , rS = 0.2),trace=TRUE,
data = ds_glands)
m2 = nls(log10.def ~ log10((-cc*1+cc*1*exp(rS*t/cc)+0)/exp(rS*t/cc)),
start = list(cc=0.1 , rS=0.1 ),trace=TRUE,
data = ds_glands)
summary(m2)
#reg_25
data1$Summe<-data1$amount
data1$time<-data1$DAY
ds_glands0=subset(data1, TEMP=="25")
str(ds_glands0)
ds_glands0$def = ds_glands0$Summe
ds_glands0$t = ds_glands0$time
ds_glands = subset(ds_glands0, amount>0.01)
ds_glands$log10.def <- log10((ds_glands$def+1))
shapiro.test(ds_glands$def)
shapiro.test(ds_glands$log10.def)
#m2 = nls(def ~ (-cc*1+cc*1*exp(rS*t/cc)+0)/exp(rS*t/cc),
start = list(cc = 0.2 , rS = 0.2),trace=TRUE,
data = ds_glands)
m2 = nls(log10.def ~ log10((-cc*1+cc*1*exp(rS*t/cc)+0)/exp(rS*t/cc)),
start = list(cc=0.1 , rS=0.1 ),trace=TRUE,
data = ds_glands)
summary(m2)
#reg_30
data1$Summe<-data1$amount
data1$time<-data1$DAY
ds_glands0=subset(data1, TEMP=="30")
str(ds_glands0)
ds_glands0$def = ds_glands0$Summe
ds_glands0$t = ds_glands0$time
ds_glands = subset(ds_glands0, amount>0.01)
ds_glands$log10.def <- log10((ds_glands$def+1))
shapiro.test(ds_glands$def)
shapiro.test(ds_glands$log10.def)
#m2 = nls(def ~ (-cc*1+cc*1*exp(rS*t/cc)+0)/exp(rS*t/cc),
start = list(cc = 0.2 , rS = 0.2),trace=TRUE,
data = ds_glands)
m2 = nls(log10.def ~ log10((-cc*1+cc*1*exp(rS*t/cc)+0)/exp(rS*t/cc)),
start = list(cc=0.1 , rS=0.1 ),trace=TRUE,
data = ds_glands)
summary(m2)
#reg_35
data1$Summe<-data1$amount
data1$time<-data1$DAY
ds_glands0=subset(data1, TEMP=="35")
str(ds_glands0)
ds_glands0$def = ds_glands0$Summe
ds_glands0$t = ds_glands0$time
ds_glands = subset(ds_glands0, amount>0.01)
ds_glands$log10.def <- log10((ds_glands$def+1))
shapiro.test(ds_glands$def)
shapiro.test(ds_glands$log10.def)
#m2 = nls(def ~ (-cc*1+cc*1*exp(rS*t/cc)+0)/exp(rS*t/cc),
start = list(cc = 0.2 , rS = 0.2),trace=TRUE,
data = ds_glands)
m2 = nls(log10.def ~ log10((-cc*1+cc*1*exp(rS*t/cc)+0)/exp(rS*t/cc)),
start = list(cc=2 , rS=1 ),trace=TRUE,
data = ds_glands)
#reg_40
ds_40$Summe<-ds_40$amount
ds_40$time<-ds_40$DAY
ds_glands0$def = ds_glands0$Summe
ds_glands0$t = ds_glands0$time
ds_glands = subset(ds_glands0, amount>0.01)
ds_glands$log10.def <- log10((ds_glands$def+1))
shapiro.test(ds_glands$def)
shapiro.test(ds_glands$log10.def)
#m2 = nls(def ~ (-cc*1+cc*1*exp(rS*t/cc)+0)/exp(rS*t/cc),
start = list(cc = 0.2 , rS = 0.2),trace=TRUE,
data = ds_glands)
m2 = nls(log10.def ~ log10((-cc*1+cc*1*exp(rS*t/cc)+0)/exp(rS*t/cc)),
start = list(cc=1 , rS=0.1 ),trace=TRUE,
data = ds_glands, na.action=na.exclude)
summary(m2)
#################################################################
##### Predator succcess rate #####
Use success rate from Heethoff & Rall 2015 Chemoecology
suc= 0.28
#####################################################################
############################ numerical model ########################
#####################################################################
model.tox.fr <- function(t, x, parms){
Nj<-x[1]
S<-x[2]
with(as.list(parms),{
es = AS*KS
Ns = Nj*S/KS
Ps = rS*(1-S/KS)
fr = suc*a*(Nj-Ns) / (1 + suc*a*th*(Nj-Ns) + (1-suc)*a*thS*(Nj-Ns) + a*thS*Ns)
frs = a*Ns / (1 + suc*a*th*(Nj-Ns) + (1-suc)*a*thS*(Nj-Ns) + a*thS*Ns)
dNj = -fr*Ni
dS = Ps-es*frs/Nj*Ni
list(c(dNj, dS))
}
)
}
model.chem.fr <- function(t, x, parms){
Nj<-x[1]
S<-x[2]
with(as.list(parms),{
es = AS*KS
Ns = Nj*S/KS
Ps = rS*(1-S/KS)
fc = a*(suc*Nj-(1-suc)*Ns) / (1 + suc*a*th*(Nj-Ns) + (1-suc)*a*thS*(Nj-Ns) + a*thS*Ns)
dNj = -fc*Ni
dS = Ps-es*fc/Nj*Ni
list(c(dNj, dS))
}
)
}
#############################################################################
##### model parameters: ########################################################
#############################################################################
# mass of mites:
#15°C:0.000025022
#20°C:0.000032612
#25°C:0.000037419
#30°C:0.000030815
#35°C:0.000026667
#40°C:0.000017301
### Calculations for FR-priors; example for 15C, adpent accordingly
mr <-0.000025022 # mite mass in g
mc <- 0.0035 # predator mass in g
radius <- 2.5
radius
area <- pi*radius^2 # area of arena in cmÂ²
area
temp <- 15
boltz <- 0.00008617343
T0 <- 293.15
temp.kelvin <- 273.15+temp
temp.kT <- (T0-temp.kelvin)/(boltz*temp.kelvin*T0)
y.mass <- exp(-9.66 +0.45*log(mr) -0.47*log(mc) -0.26*temp.kT)*60*60 ## maximum ingestion in g_prey/g_predator/h
y.ind <- y.mass / mr * mc ## maximum ingestion in prey/predator/h
y.ind
###########################
th.start <- 1/y.ind ## handling time in h
th.start
###########################
n0.mass <- exp(3.44 +0.2*log(mr) +0.33*log(mc) +0.12*temp.kT) ## halfsat in g_prey / A2
n0.ind <- n0.mass / mr ## halfsat in prey / A2
n0.ind
n0.ind.arena <- n0.ind/100/100*area
n0.ind.arena
###########################
a.start <- 1/(n0.ind.arena*th.start) ## attack rate in arena / h / predator
a.start
###########################
###########################
thS.start <- 0.5/60/60
thS.start
###########################
#Functional response model
ts.def = as.data.frame(lsoda(y = c(Nj=100, S=coef(m2)[[1]]),
times = seq(0,100,1),
func = model.tox.fr,
parms = c(KS = coef(m2)[[1]],
rS = coef(m2)[[2]],
AS = 1/(coef(m2)[[1]]/50),
a = a.start,
th = th.start,
thS = thS.start,
Ni = 1,
suc = exp(coef(suc.glm)[[1]]) / (1 + exp(coef(suc.glm)[[1]]))
)
)
)
ts.nodef = as.data.frame(lsoda(y = c(Nj=100, S=0),
times = seq(0,100,1),
func = model.tox.fr,
parms = c(KS = coef(m2)[[1]],
rS = coef(m2)[[2]],
AS = 1/(coef(m2)[[1]]/50),
a = a.start,
th = th.start,
thS = thS.start,
Ni = 1,
suc = exp(coef(suc.glm)[[1]]) / (1 + exp(coef(suc.glm)[[1]]))
)
)
)
par(mfrow=c(1,1), las=1, pty="s")
plot(c(ts.def$time,ts.nodef$time),c(ts.def$Nj,ts.nodef$Nj),type="n", xlab = "time [d]", ylab = "mites per arena",ylim=c(0,10))
lines(ts.def$time,ts.def$Nj, col="darkorchid",lwd=4)
lines(ts.nodef$time,ts.nodef$Nj, col="black",lwd=4)
dev.off()
